# Supplementary material for: Blended Polymer Dry Electrodes for Reliable Electrocardiogram and Electromyogram Measurements and Their Eco-Friendly Disposal Led by Degradability in Hot Water
Source: MDPI journal article supplement (doi:10.3390/polym14132586), 2022-06-26
Supplement: s1 [file s1]

Supporting Information

# Blended Polymer Dry Electrodes for Reliable Electrocardiogram and Electromyogram Measurements and their Eco-Friendly Disposal Led by Degradability in Hot Water

Dong Hyun Lee <sup>1,†</sup>, Eun Kwang Lee <sup>2,†</sup>, Chae Hyun Kim <sup>1,†</sup>, Hyung Joong Yun <sup>3</sup> Young-Joon Kim <sup>1,\*</sup>, and Hocheon Yoo <sup>1,\*</sup>

<sup>1</sup> Department of Electronic Engineering, Gachon University, 1342 Seongnam-daero, Seongnam 13120, Republic of Korea; danny99hodam@gachon.ac.kr, gch427@gachon.ac.kr

<sup>2</sup> Department of Chemical Engineering, Pukyong National University (PKNU); eklee@pknu.ac.kr

<sup>3</sup> Advance Nano Research Group, Korea Basic Science Institute (KBSI), Daejeon 34126, Republic of Korea; hjyun@kbsi.re.kr

<sup>†</sup> These authors contributed equally to this work

\* Correspondence: youngkim@gachon.ac.kr(Y.K.); hyoo@gachon.ac.kr(H.Y.)

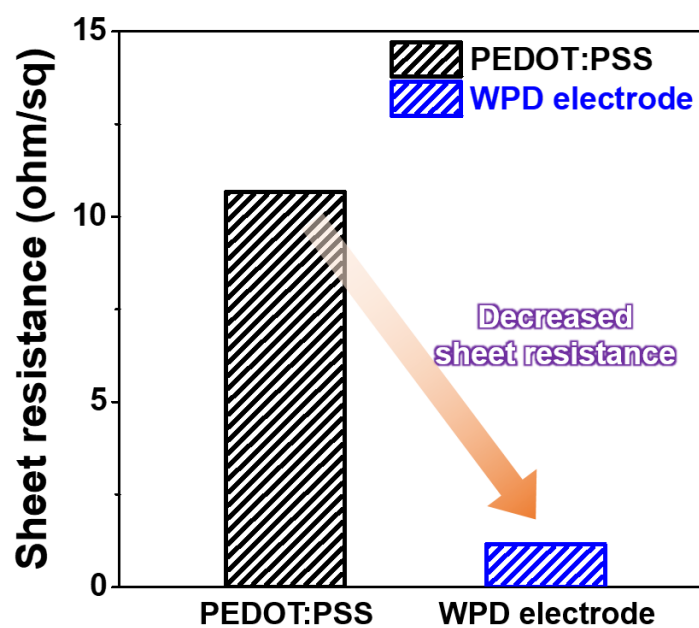

**Figure S1** Sheet resistance of PEDOT:PSS electrode and the proposed WPD electrode

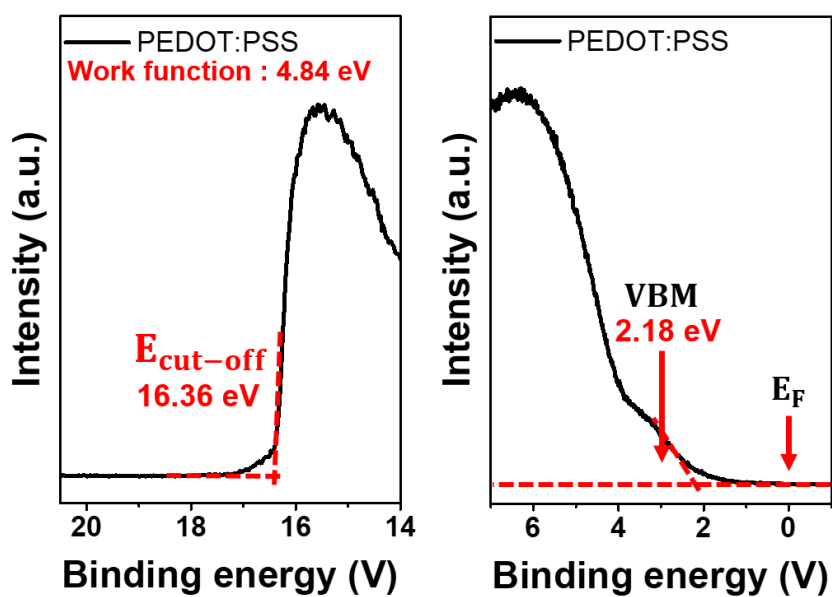

Figure S2 The UPS analysis of the PEDOT:PSS.

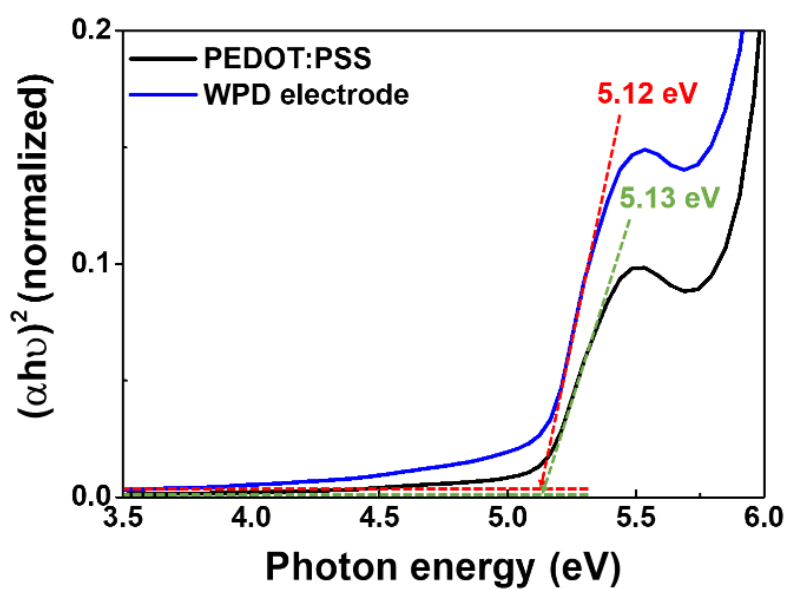

Figure S3 Optical bandgap of the PEDOT:PSS electrode and the proposed WPD electrode shown in the Tauc plot method.

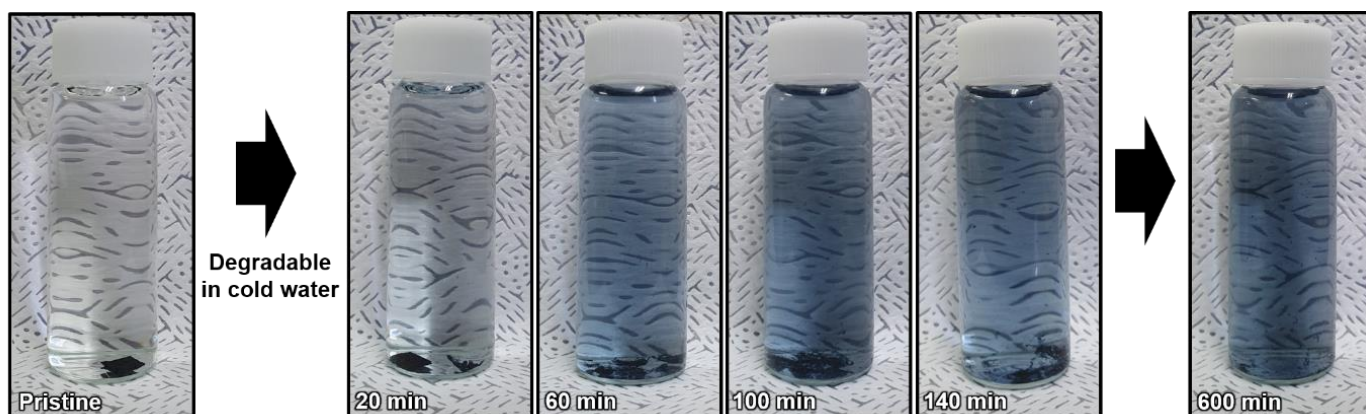

**Figure S4** Photography of WPD electrode degradable performance over time immersed in cold water..
